# Supplementary material for: Differentiating percussion pits and carnivore tooth pits using 3D reconstructions and geometric morphometrics
Source: PLoS One. 2018 Mar 28;13(3):e0194324. doi: 10.1371/journal.pone.0194324 (PMC5874019; doi:10.1371/journal.pone.0194324)
Supplement: S2 Appendix — (XLSX) [file pone.0194324.s002.xlsx]

## Sheet: Reliability test
Data used to prove the replicability of the study & results
20 different percussion marks (PM) generated on a femur and a tibia using an unmodified quarztite hammerstone were independently landmarked by two observers (Observer 1 & Observer 2)
The PM landmarked by Observer 2 were named with a J before the PM id.
Results show that the method used in this study can be confidently replicated, since they are statistically very similar, showing no significant graphical neither numerical difference.
X, Y, Z Coordinates obtained for each PM
'F10			Figure S2. PCA plot of the replicability test.
0.854437 0.038172 2.20249			The paired PMs appear always very close to each other in shape space, demonstrating that the landmarking process can be confidently repeated by different observers.
0.666548 1.14561 2.24795
0.996321 0.659538 2.03433
0.534734 0.560988 2.4824
0.665753 0.649695 2.20047
0.979125 0.214155 2.07855
1.01399 0.433333 2.03378
0.916479 0.880628 2.04611
0.801512 1.0527 2.08265
0.702371 0.143583 2.32954
0.591564 0.341177 2.44069
0.509208 0.824847 2.47031
0.608363 1.01107 2.3394
0.792283 0.297832 2.17119
0.662158 0.909178 2.21419
0.850075 0.65484 2.1013
0.5871 0.610966 2.40531
'F11
-2.16012 4.38809 2.19262
0.857308 4.30454 0.890873
-0.460497 3.179 1.15683
-0.385688 5.25917 1.21039
-0.448912 4.24253 0.843862
-1.88621 3.57464 1.85945
-1.29524 3.27497 1.53099
0.166298 3.2496 0.789837
0.628133 3.58319 0.630578
-1.60561 4.8664 1.89113
-1.00513 5.14488 1.58385
0.34806 5.30472 0.909751
0.635398 4.85719 0.851716
-1.62726 4.24779 1.61256
0.288106 4.23174 0.796682
-0.474612 3.5964 1.0223				Table S2. MANOVA test results
-0.473571 4.9915 1.10429
				Wilks' lambda	F	p value
'F12				0.9595	0.1223	0.9993
4.62086 1.25394 -0.125866
4.01199 -1.4917 0.324502				Wilks' lambda is very close to 1, indicating a great similarity between the measurements taken by the two observers.
3.32233 -0.529135 0.855429				The F value is low, indicating small differences between both sample means.
4.84835 -0.819806 -0.0498548				The p value is >0.05 and close to 1, showing that there is no statistical difference between the means of the repeated data.
3.90233 -0.596782 0.176268
4.17775 0.668802 0.255306
3.60454 0.0431509 0.703469
3.34739 -1.06428 0.803167
3.73452 -1.44379 0.522483
4.98762 0.610929 -0.351029
4.95305 -0.269119 -0.237488
4.60855 -1.36596 -0.096271
4.27284 -1.56147 0.146904
4.24174 0.218449 -0.0344958
3.77043 -1.12724 0.305575
3.46817 -0.609004 0.648232
4.38746 -0.784044 0.100757
'F13
0.730777 4.73503 2.4293
3.85286 -3.5885 1.42277
1.17241 -0.968488 2.85592
4.11622 -0.148638 0.745598
2.44835 -0.570721 1.52026
0.892887 2.74965 2.6051
1.28163 1.00927 2.68021
1.88213 -2.45292 2.5665
2.74522 -3.25973 2.07859
2.33358 3.51836 1.28312
3.47015 1.75957 0.773013
4.61785 -1.53229 0.605284
4.46598 -2.72861 0.913984
1.23035 3.32169 1.93817
3.27138 -2.68941 1.49656
1.83041 -0.831129 2.369
3.38709 -0.358099 1.22393
'F16-1
1.54356 3.59579 1.77467
2.21056 -1.10144 -1.00768
1.02144 0.630359 1.85592
3.16987 1.97577 -0.461873
2.19177 1.45592 0.0512486
0.84027 2.63684 2.30308
0.717145 1.34956 2.43648
1.27292 -0.161001 0.994923
1.40107 -0.979864 0.0290027
2.24049 3.46442 0.920809
2.75357 2.69179 0.137566
3.6116 0.988204 -1.12152
3.22817 0.0152406 -1.30479
1.6871 2.42235 1.06058
2.08008 -0.439982 -0.600277
1.58397 1.07538 1.14209
2.79083 1.80136 -0.208321
'F16-2
-0.287206 4.43592 3.8836
-2.88691 1.3039 7.49562
-1.91047 4.40521 6.46516
-0.79226 1.65336 4.61257
-1.79915 3.41451 5.71013
-0.804146 4.97493 4.54567
-1.5684 5.06011 5.65506
-2.45691 3.60825 7.1287
-2.6791 2.56959 7.41505
-0.122841 3.4451 3.85409
-0.336609 2.54251 4.16815
-1.69799 0.850163 5.49559
-2.49613 0.30595 6.54332
-0.990064 4.06147 4.64253
-2.51874 1.97109 6.94714
-1.81359 3.84174 6.17766
-1.05195 2.14659 4.93878
'F17
0.758858 0.969494 1.79849
0.439075 3.80976 1.85196
1.15491 2.61344 1.12399
-0.29561 2.45566 2.88321
0.317491 2.51905 1.88721
1.09686 1.3282 1.43944
1.21666 1.99106 1.14445
0.930738 3.11927 1.2396
0.709903 3.52569 1.49493
0.226062 1.27836 2.28521
0.0756719 1.80915 2.54548
-0.168725 3.14622 2.62841
0.0680165 3.60115 2.32629
0.717731 1.76048 1.74304
0.370861 3.33047 1.91513
0.788679 2.55795 1.50223
0.293576 2.36397 2.25947
'F18
2.52682 -1.60568 1.46437
1.49928 3.92589 3.33384
3.28396 1.34977 2.01126
-0.145103 0.437837 3.70542
1.79662 1.22167 2.48806
3.13168 -0.574404 1.48851
3.331 0.425933 1.73064
2.92059 2.52633 2.39725
2.48518 3.36043 2.87293
1.29127 -1.21748 2.31941
0.403749 -0.595945 3.07095
0.115174 2.04919 3.76507
0.746891 3.19262 3.65893
2.34919 -0.746516 1.79055
1.67368 2.80529 2.96744
2.61704 1.32555 2.22536
0.644567 0.820208 3.18206
'F19
0.652686 6.07886 0.550471
-1.813 2.30182 1.25719
-1.3399 4.93725 1.80613
0.555969 3.36109 -0.106508
-0.575767 4.3369 0.839798
-0.0435643 6.02616 1.03499
-0.674532 5.61756 1.44864
-1.76503 4.03795 1.84327
-1.9365 3.18165 1.71399
0.78054 5.3274 0.0598698
0.733814 4.44343 -0.128677
-0.181532 2.49347 0.123431
-1.1319 2.04634 0.592085
0.0439818 5.28701 0.674516
-1.47645 2.69292 1.09628
-1.05573 4.71476 1.44994
0.108396 3.74312 0.263453
'F20
3.22335 1.8214 -1.06676
2.70148 4.09405 0.554134
4.00814 3.56412 -0.656549
1.85476 2.25605 0.0982146
2.77983 3.02155 -0.37376
3.80656 2.32507 -1.13415
4.11815 2.98224 -0.991458
3.76967 4.08892 -0.211397
3.34236 4.17073 0.154572
2.63437 1.79913 -0.744411
2.16133 2.02453 -0.298881
2.06175 2.92399 0.477893
2.22659 3.52506 0.640382
2.9213 2.39253 -0.785793
2.76382 3.74353 0.175448
3.67166 3.46079 -0.552245
2.01559 2.49723 -0.0217013
'T2-1
-2.10408 1.94848 3.43262
-0.488184 6.42261 1.96482
-0.0230844 3.38694 2.4
-2.62076 4.79717 3.55429
-1.38471 4.16745 2.8135
-1.33598 2.11311 3.0142
-0.5307 2.63052 2.62535
0.0880643 4.3049 2.14857
-0.0725839 5.24143 2.05728
-2.48658 2.87025 3.64059
-2.47404 3.93911 3.55111
-1.96894 5.65417 3.0016
-1.30613 6.18777 2.48501
-1.68738 3.20568 3.08792
-0.67486 5.75458 2.2409
-0.469592 3.62137 2.46014
-2.06935 4.56766 3.21575
'T2-2
-0.260908 2.57156 2.48565
1.81245 1.67205 1.5632
0.359045 1.22549 2.18466
1.19065 3.09877 1.79363
0.536132 2.16255 2.01926
-0.301242 2.01235 2.51468
-0.0279261 1.57427 2.41994
0.875831 0.964155 1.84193
1.44919 1.1829 1.61091
0.208868 3.22732 2.30166
0.71586 3.31783 2.04212
1.5992 2.76182 1.61089
1.79636 2.22154 1.5639
0.0411526 2.39256 2.33228
1.23451 1.84654 1.78173
0.490939 1.48717 2.05901
1.04292 2.78254 1.85022
'T3
3.3333 1.7684 0.51488
0.659927 -1.55075 1.93416
0.859779 1.57953 1.71768
3.03641 -1.38299 0.57955
2.10938 -0.323209 0.842601
2.53908 1.89425 0.883215
1.7194 1.89998 1.31215
0.583117 0.631182 1.76884
0.685844 -0.333425 2.01182
3.5508 0.787336 0.308522
3.474 -0.187909 0.282752
2.3615 -1.71853 0.900753
1.58655 -1.80891 1.41284
2.63925 0.974305 0.719835
1.2353 -0.831696 1.62292
1.20841 1.10118 1.43922
2.5735 -0.903852 0.648592
'T4-1
4.76461 3.40223 -0.841629
4.2175 0.944048 -0.143947
4.11171 2.48812 -0.271662
5.12388 1.81012 -0.896235
4.57102 2.12504 -0.590485
4.40283 3.22895 -0.587824
4.18795 2.92175 -0.396298
3.99835 2.02188 -0.137228
3.93454 1.52507 -0.0828626
5.03368 2.91631 -0.971774
5.12 2.34515 -0.983884
4.85867 1.42489 -0.672096
4.60351 1.07706 -0.459061
4.66183 2.84117 -0.748231
4.26627 1.30213 -0.317188
4.31406 2.30974 -0.405592
4.85397 1.97629 -0.752133
'T4-2
-0.458898 0.967781 2.81585
0.479746 -2.97147 2.82987
-0.818284 -1.70759 3.42375
0.751186 -1.16363 2.31591
-0.218591 -1.39494 2.84306
-0.904528 0.10087 3.17353
-0.836012 -0.737267 3.25141
-0.576806 -2.4418 3.37793
-0.128947 -2.7785 3.13218
0.449628 0.655088 2.256
0.730156 -0.220678 2.17031
0.76123 -1.81154 2.43156
0.698189 -2.45739 2.58
-0.311198 -0.0722668 2.69879
0.0760279 -2.25995 2.87722
-0.592443 -1.6396 3.11602
0.372359 -1.22171 2.56724
'T5
0.463798 9.26641 1.69396
0.836351 2.27468 1.6014
-2.82509 5.8305 4.19193
2.89982 4.81223 0.22925
0.39164 5.29428 1.64194
-0.550185 8.30878 2.58893
-1.58117 7.06831 3.32402
-1.73297 4.24925 3.36651
-0.626922 3.4766 2.49655
1.98429 8.33791 0.722664
2.44012 6.52781 0.494758
2.47225 3.64365 0.395372
1.82937 2.71414 0.779848
0.600008 7.39811 1.93321
0.672155 3.18464 1.73336
-1.82669 5.51752 3.36717
2.19115 4.91416 0.625311
'T6
-3.98639 -0.450424 4.66508
1.59432 -0.657578 0.375928
-0.44966 -2.14468 1.80766
-0.220244 1.15254 2.10801
-0.932544 -0.4916 2.09492
-2.92856 -1.51712 3.60036
-1.86994 -1.98691 2.81849
0.531079 -2.05805 0.806959
1.21894 -1.66958 0.399642
-2.89056 0.920376 4.05359
-1.50048 1.07655 2.98871
1.08087 0.675828 1.25461
1.66805 0.312032 0.624676
-2.8225 -0.594121 3.59458
0.797223 -0.674168 0.853262
-0.56705 -1.50103 1.81333
-0.334068 0.409729 1.93733
'T8-1
-0.15611 4.06808 4.73067
3.47901 4.49909 2.2602
1.40473 2.35205 3.58057
1.53841 6.32195 3.18715
1.84382 4.04521 3.06749
0.125309 3.1153 4.51018
0.734558 2.35 4.04539
2.25968 2.53187 2.88432
3.02895 3.2951 2.4173
0.0325766 5.15302 4.56851
0.793452 6.05223 3.90534
2.3373 6.00223 2.69576
3.02982 5.29692 2.53956
0.529255 4.16742 4.15774
2.67071 4.22943 2.71068
1.45937 3.08188 3.3597
1.5269 5.41314 3.29415
'T8-2
-1.08642 0.56517 5.06068
4.76832 -0.237709 0.165939
1.41528 -1.05286 2.41352
2.20912 1.42733 2.80538
1.65282 0.623376 2.39267
-0.63193 -0.466667 4.23282
0.310048 -0.796675 3.36932
2.5928 -0.926258 1.49017
3.55777 -0.759097 0.82815
-0.258893 1.81645 4.66123
0.933718 1.91609 3.80205
3.27628 0.943954 1.90499
4.10179 0.712973 1.22535
-0.879369 0.780193 4.28158
3.57736 -0.127374 0.887482
1.4847 -0.393729 2.48621
2.12554 0.9845 2.80797
'T9
3.44702 3.12389 1.33303
-1.59428 4.71027 4.59591
0.75005 5.46675 3.12354
0.0840096 3.00061 3.3094
0.163499 4.53776 3.09371
2.56014 4.37899 2.04586
1.76853 4.92482 2.57993
-0.300247 5.58496 3.7303
-1.0638 5.29009 4.27821
2.23747 2.57981 1.98567
1.14107 2.59471 2.66441
-0.737523 3.38614 3.81752
-1.25535 3.9574 4.31729
2.13311 3.63147 1.97898
-1.03042 4.73851 3.9075
0.444325 5.01536 3.11177
-0.102119 3.51772 3.42232
'J_F10
0.854165 0.0654489 2.19677
0.677397 1.11939 2.23752
0.983297 0.679386 2.04385
0.527783 0.547547 2.48743
0.665425 0.636581 2.2005
0.946183 0.262807 2.0892
0.994064 0.48295 2.04291
0.878254 0.906526 2.06594
0.76585 1.0514 2.11301
0.709293 0.178256 2.32072
0.601458 0.33687 2.43297
0.486388 0.792264 2.50287
0.546163 0.987005 2.38903
0.788649 0.302201 2.17903
0.668643 0.929214 2.21711
0.827452 0.668526 2.10959
0.594818 0.584069 2.39243
'J_F11
-2.12605 4.38491 2.16604
0.852957 4.27973 0.910633
-0.462369 3.2553 1.13494
-0.389206 5.18766 1.22351
-0.491949 4.33996 0.862368
-1.92203 3.66414 1.88786
-1.3084 3.26966 1.55175
0.1373 3.279 0.795074
0.665879 3.67043 0.659435
-1.62214 4.86032 1.90736
-0.971605 4.97977 1.48802
0.306809 5.31129 0.932823
0.606163 4.8557 0.861185
-1.60314 4.27741 1.5815
0.290971 4.2605 0.796905
-0.460242 3.4801 1.06209
-0.397438 5.0635 1.14435
'J_F12
4.57613 1.07024 -0.133543
4.02437 -1.47452 0.310188
3.23311 -0.67353 0.912021
4.86341 -0.780668 -0.0475626
3.93188 -0.535964 0.150621
4.04008 0.585266 0.389666
3.59997 0.00850219 0.705804
3.41046 -1.11872 0.752791
3.71053 -1.33806 0.53267
4.89607 0.523575 -0.25799
4.98906 -0.18605 -0.291012
4.69275 -1.27691 -0.128023
4.33477 -1.47609 0.0868672
4.40058 0.400569 -0.141912
3.93048 -1.20413 0.16616
3.37398 -0.69788 0.744701
4.44277 -0.77227 0.0425115
'J_F13
0.7896 4.69289 2.39707
3.91338 -3.62754 1.38298
1.29548 -0.814545 2.84477
3.93074 -0.0126652 0.88004
2.46817 -0.307848 1.45654
0.920849 2.88191 2.55017
1.2739 0.969074 2.69278
1.9568 -2.53427 2.51693
2.80543 -3.35659 2.07359
2.31593 3.37919 1.33373
3.24956 1.81526 0.903799
4.55753 -1.32389 0.559836
4.57302 -2.59262 0.821676
1.2716 3.27876 1.91515
3.36062 -2.61441 1.42853
1.72767 -0.558278 2.43969
3.43871 -0.12037 1.2265
'J_F16-1
1.49911 3.52346 1.79586
2.18335 -1.14458 -1.02505
1.07443 0.729088 1.83457
3.15534 1.95986 -0.433945
2.22671 1.54541 0.0459728
0.822599 2.58459 2.31253
0.765971 1.45698 2.36453
1.17941 -0.125463 1.07711
1.39051 -0.907427 0.0789716
2.10981 3.40877 1.01533
2.68194 2.71315 0.240468
3.58107 0.959396 -1.087
3.23017 0.00820768 -1.31
1.67589 2.44923 1.07603
1.99608 -0.506413 -0.664976
1.61201 1.12118 1.09037
2.72038 1.74894 -0.190314
'J_F16-2
-0.183961 4.22923 3.77748
-2.89945 1.3057 7.51533
-2.00975 4.06835 6.58755
-0.883145 1.70031 4.75825
-1.67247 2.8684 5.53713
-0.719253 4.87318 4.37578
-1.49592 4.95942 5.43857
-2.48634 3.12432 7.10977
-2.78085 2.34912 7.54227
-0.112297 3.25037 3.93139
-0.423393 2.4453 4.2859
-1.67471 0.961808 5.55664
-2.46413 0.545613 6.51805
-1.06785 3.49632 4.73543
-2.64655 1.57843 7.06164
-1.95316 3.64498 6.25092
-1.12201 1.97897 5.04491
'J_F17
0.680314 0.95868 1.86649
0.396199 3.7397 1.87969
1.105 2.6023 1.17573
-0.262296 2.51547 2.81161
0.322013 2.44875 1.89019
1.00253 1.29715 1.49928
1.26967 1.78537 1.20358
0.850611 3.16687 1.32491
0.623504 3.55004 1.58734
0.256538 1.36715 2.22877
0.0226827 1.79999 2.50911
-0.0706735 3.03797 2.49119
0.0854378 3.47767 2.29493
0.699124 1.69937 1.75497
0.350477 3.22282 1.95277
0.814811 2.53573 1.48371
0.262899 2.33008 2.21335
'J_F18
2.5023 -1.61733 1.47612
1.45059 3.97197 3.37019
3.21186 1.41334 2.09001
-0.0595078 0.378807 3.63532
1.82745 1.22943 2.47409
3.08851 -0.570229 1.51147
3.28483 0.432491 1.75677
2.88148 2.45461 2.40634
2.37735 3.29728 2.89274
1.27772 -1.27004 2.29785
0.469354 -0.636007 3.01651
0.206956 1.92586 3.70756
0.804205 3.13771 3.61092
2.42062 -0.748459 1.76232
1.72876 2.84122 2.94789
2.62716 1.30187 2.22129
0.663981 0.788512 3.15473
'J_F19
0.685816 6.06364 0.515818
-1.8235 2.30573 1.26168
-1.35078 5.02288 1.82866
0.484276 3.4027 -0.0826883
-0.556877 4.34852 0.833905
-0.056386 5.89959 1.00773
-0.697368 5.59893 1.45463
-1.79067 4.05833 1.86367
-1.98077 3.2163 1.75738
0.698267 5.29531 0.13747
0.678373 4.36288 -0.0958567
-0.232589 2.52636 0.143773
-1.03598 2.09563 0.520995
0.0220242 5.27319 0.683817
-1.4816 2.6988 1.10708
-1.04264 4.77085 1.46127
0.0636983 3.7614 0.309649
'J_F20
3.224 1.79262 -1.09324
2.68758 4.04796 0.535995
3.95319 3.54258 -0.639736
1.87328 2.28528 0.0898251
2.76165 3.01454 -0.362362
3.76162 2.44812 -1.05129
4.00289 2.98663 -0.936478
3.62934 3.98453 -0.213814
3.29459 4.19017 0.191411
2.62766 1.77847 -0.747823
2.14041 2.03104 -0.273143
2.08214 2.92562 0.461228
2.3079 3.51632 0.552025
2.87723 2.50816 -0.703115
2.7149 3.65344 0.150003
3.67074 3.4489 -0.563457
2.06476 2.49102 -0.0509794
'J_T2-1
-2.14022 1.97487 3.45471
-0.470258 6.40602 1.96135
-0.00747454 3.35165 2.39548
-2.60723 4.79049 3.54641
-1.41039 4.13111 2.82752
-1.29772 2.15751 2.99246
-0.414619 2.80578 2.57064
0.0068354 4.11609 2.25707
-0.0130494 5.12906 2.0634
-2.40926 2.94979 3.58222
-2.46739 3.96528 3.55243
-2.00717 5.62209 3.03348
-1.26443 6.21872 2.45718
-1.60589 3.33329 3.03176
-0.676373 5.75224 2.24267
-0.46724 3.56537 2.46791
-2.06096 4.56162 3.2127
'J_T2-2
-0.228232 2.54443 2.47246
1.78675 1.68433 1.5722
0.327362 1.27045 2.207
1.20297 3.0673 1.79144
0.537699 2.15491 2.02014
-0.247695 2.02477 2.47708
0.0405536 1.49979 2.3852
0.85061 0.907939 1.85126
1.42692 1.18704 1.61702
0.112861 3.0873 2.32664
0.692791 3.29147 2.05758
1.59963 2.72773 1.61149
1.77582 2.21353 1.5697
0.0499611 2.35488 2.32597
1.25181 1.85827 1.77481
0.436355 1.50489 2.08219
1.052 2.75823 1.84425
'J_T3
3.34284 1.73096 0.494345
0.749143 -1.54796 1.86333
0.893721 1.68905 1.69767
3.05383 -1.39498 0.575392
2.10363 -0.329234 0.8461
2.55249 1.80515 0.866591
1.73306 1.80723 1.29085
0.544304 0.677 1.80033
0.648534 -0.30603 2.0352
3.50761 0.761634 0.329056
3.38461 -0.335214 0.326738
2.3522 -1.6659 0.904439
1.61635 -1.80698 1.38955
2.54008 0.863745 0.775726
1.19086 -0.918438 1.65729
1.22175 1.10063 1.42606
2.51883 -0.819789 0.729896
'J_T4-1
4.76351 3.32826 -0.831636
4.15338 1.06927 -0.156295
4.14769 2.45031 -0.29653
5.06935 1.85029 -0.874947
4.58271 2.12997 -0.600236
4.41419 3.25213 -0.599339
4.22712 2.93463 -0.415223
4.03206 1.90873 -0.159231
3.96573 1.47448 -0.142118
4.9989 2.93641 -0.948504
5.11341 2.40284 -0.985016
4.82242 1.46792 -0.660235
4.5486 1.14889 -0.44084
4.63018 2.80163 -0.725083
4.25688 1.30511 -0.301583
4.35022 2.29851 -0.436522
4.8434 1.96815 -0.744649
'J_T4-2
-0.446996 0.877095 2.81118
0.375362 -2.8758 2.86818
-0.798618 -1.77072 3.42051
0.703462 -1.11874 2.33609
-0.209945 -1.38099 2.83376
-0.903089 0.18439 3.16382
-0.859067 -0.70348 3.27662
-0.525008 -2.4638 3.33447
-0.144424 -2.77736 3.1513
0.404051 0.660368 2.28135
0.606406 -0.150322 2.2317
0.765897 -1.80421 2.4293
0.645589 -2.35231 2.61589
-0.323112 -0.14178 2.70817
0.0819039 -2.24011 2.86928
-0.51932 -1.63753 3.07071
0.376245 -1.2775 2.56591
'J_T5
0.429469 9.12719 1.72372
0.813936 2.30518 1.61947
-2.79439 5.6261 4.17881
2.87129 4.85474 0.248747
0.397717 5.17866 1.62625
-0.402229 8.41476 2.44069
-1.55351 7.00734 3.29313
-1.76919 4.38859 3.41436
-0.651986 3.26606 2.5074
1.92977 8.28341 0.751873
2.43201 6.48989 0.507245
2.44813 3.57526 0.403578
1.5564 2.48629 1.07602
0.554354 7.41338 1.93085
0.6632 3.19951 1.71961
-1.77748 5.50493 3.33064
2.11491 4.93813 0.654894
'J_T6
-3.92135 -0.592993 4.61319
1.54587 -0.645576 0.415409
-0.496004 -2.24069 1.77782
-0.123813 1.07934 2.08785
-0.957064 -0.544513 2.10496
-3.00097 -1.54617 3.64267
-1.87147 -1.9654 2.84336
0.499956 -2.09027 0.82093
1.15172 -1.68404 0.446054
-2.86963 0.774582 4.01171
-1.49156 0.893856 2.94506
0.906096 0.781317 1.46147
1.53246 0.41682 0.733556
-2.80838 -0.640266 3.5737
0.784256 -0.680577 0.86457
-0.528996 -1.64116 1.86357
-0.435752 0.350528 1.97329
'J_T8-1
-0.163283 4.06594 4.74102
3.44647 4.49418 2.26913
1.42642 2.38383 3.56481
1.53435 6.25084 3.23686
1.80855 4.05538 3.10464
0.176785 3.08003 4.476
0.737256 2.42554 4.04077
2.27024 2.68782 2.86146
2.86678 3.48754 2.57185
-0.0121646 5.30065 4.59798
0.674462 6.17458 3.98402
2.36417 6.00645 2.67165
2.91626 5.28918 2.62217
0.544152 4.22265 4.14747
2.63029 4.3635 2.71977
1.40965 3.27804 3.39586
1.41102 5.27441 3.34755
'J_T8-2
-1.04365 0.595583 5.05215
4.71866 -0.227556 0.207855
1.48486 -1.02104 2.36639
2.31134 1.31135 3.0135
1.66328 0.631733 2.39534
-0.670411 -0.413778 4.27756
0.301361 -0.644028 3.44345
2.56193 -0.895447 1.53187
3.69793 -0.738211 0.739471
-0.260057 1.83442 4.67261
0.752827 1.92919 3.89956
3.26757 0.921518 1.89902
4.31601 0.557032 0.986354
-0.859075 0.843679 4.32244
3.54487 -0.117354 0.900123
1.52429 -0.241954 2.45911
2.10511 0.953038 2.80995
'J_T9
3.40003 3.12859 1.35922
-1.58351 4.64256 4.56937
0.743848 5.3884 3.11473
0.0999438 3.09367 3.29446
0.176389 4.55696 3.09109
2.49808 4.3457 2.08
1.64005 4.89546 2.66869
-0.291157 5.59138 3.71774
-0.968933 5.33443 4.22983
2.30394 2.57499 1.93712
1.21157 2.67222 2.62159
-0.685705 3.44039 3.78019
-1.08276 3.86727 4.22374
2.15194 3.67768 1.97684
-0.982985 4.70988 3.84672
0.415474 5.03584 3.12396
0.0804553 3.54377 3.27454
